# Supplementary material
Source: MDPI journal article supplement (https://www.mdpi.com/2225-1154/11/1/5)
Supplement: s1 [file s1]

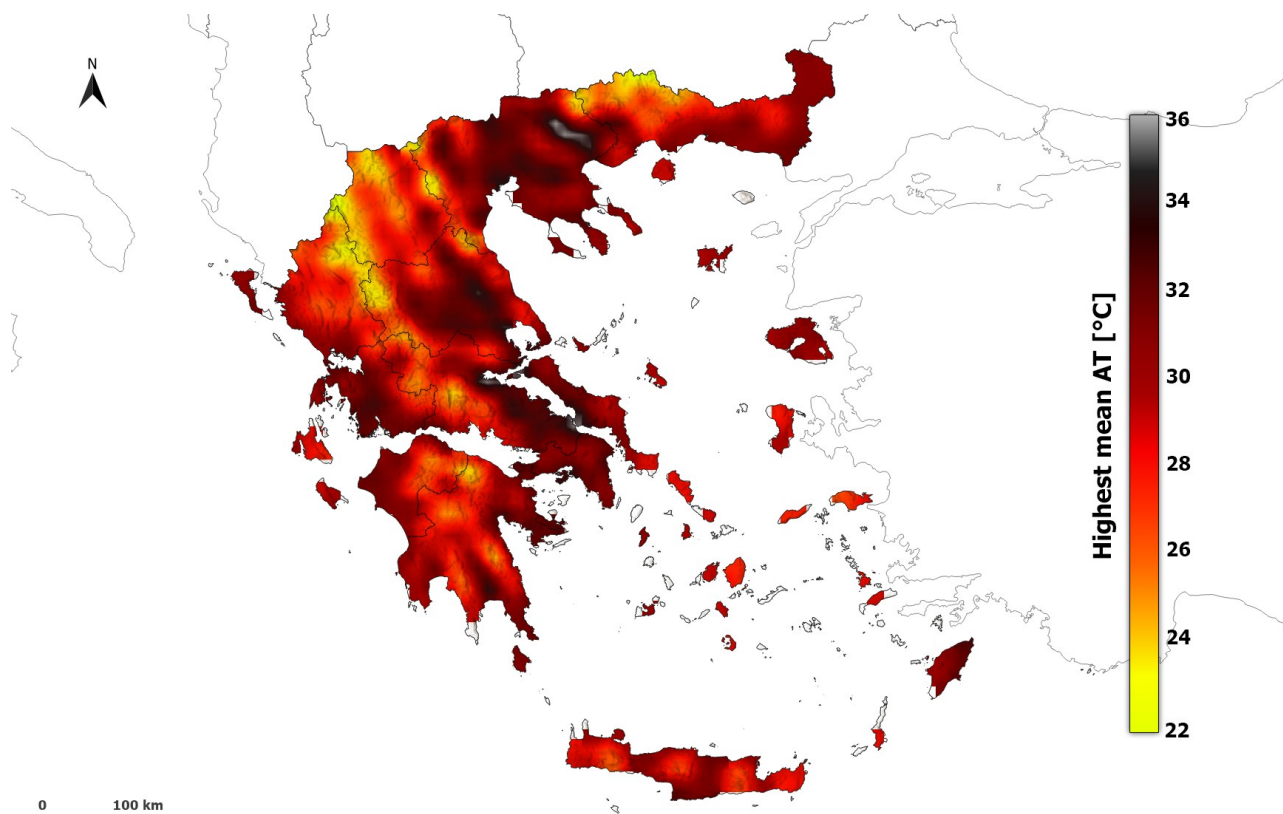

**Figure S1. Spatial distribution of averaged HWA (°C) based on all heatwave events calculated from ERA5-Land during the period 1950–2020.**

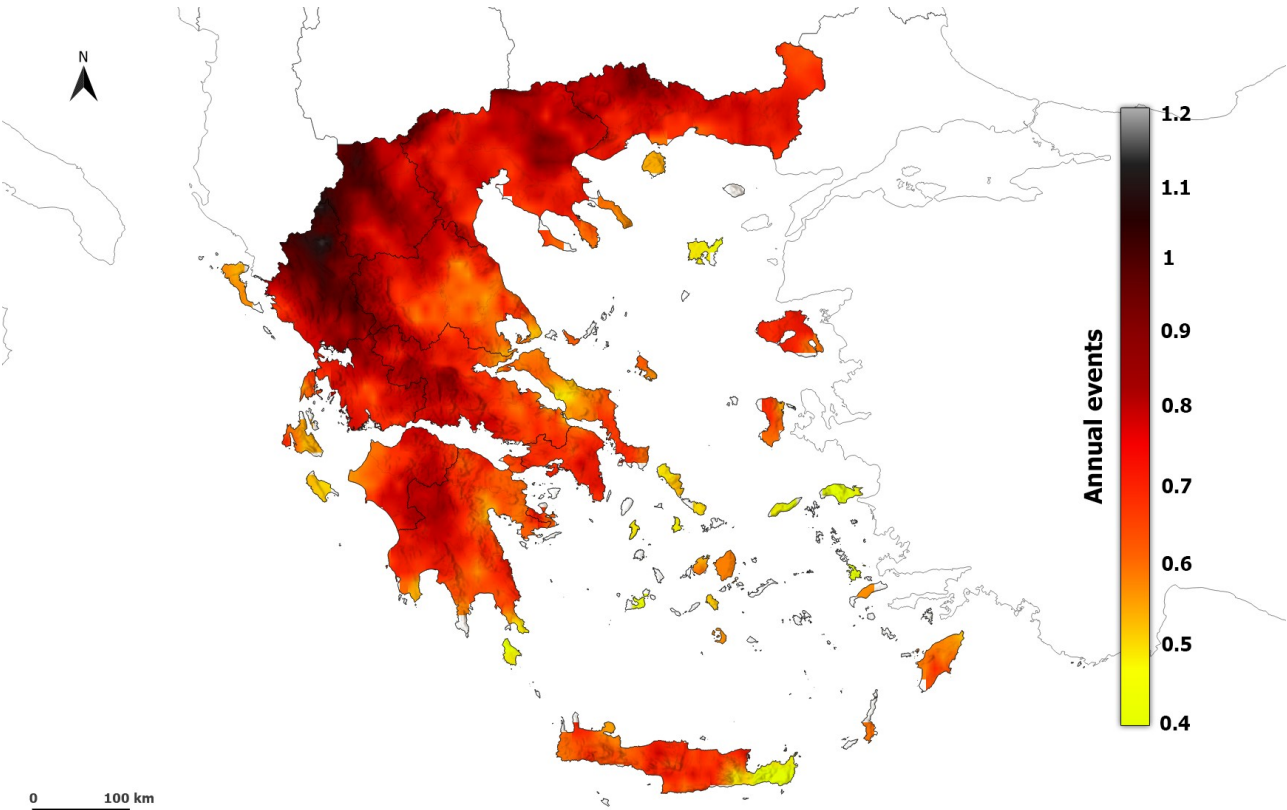

**Figure S2. Spatial distribution of averaged HWN (heatwaves) based on all heatwave events calculated from ERA5-Land during the period 1950–2020.**

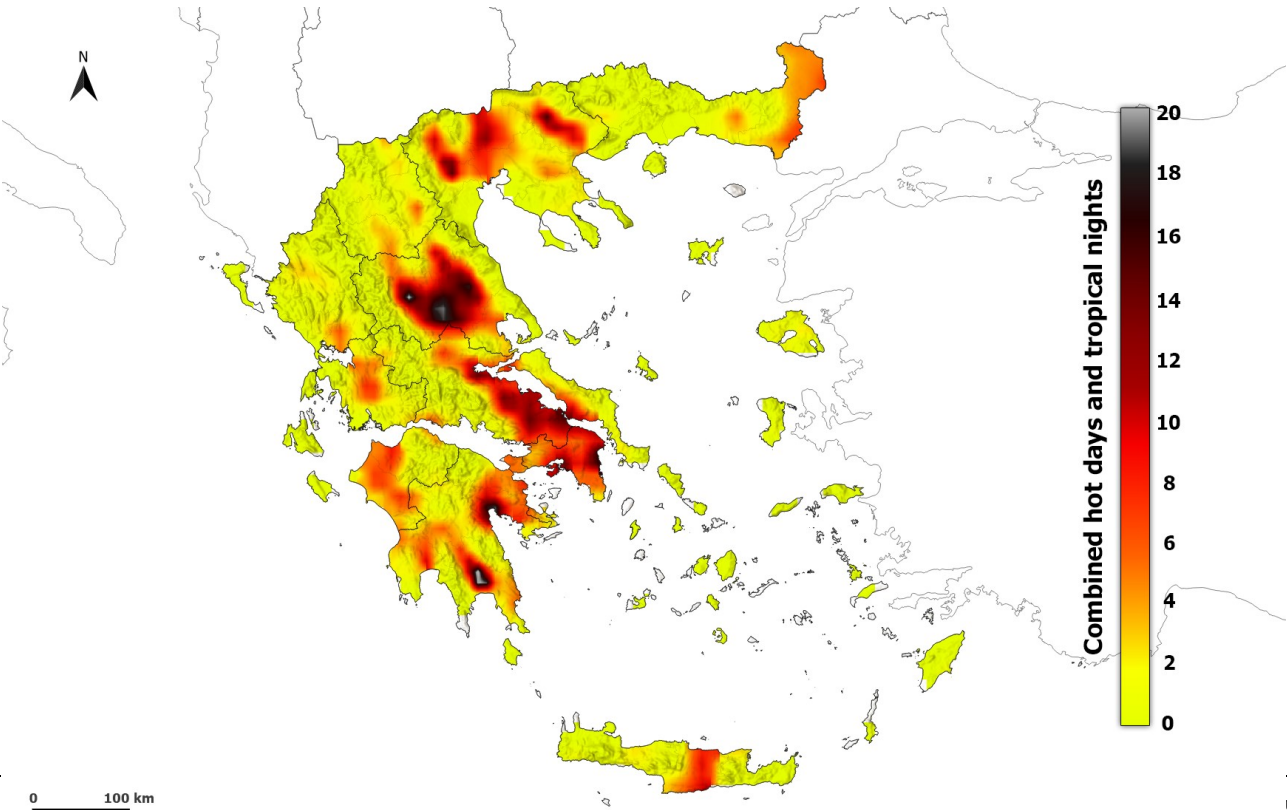

**Figure S3. Spatial distribution of averaged CHT (days) based on all heatwave events calculated from ERA5-Land during the period 1950–2020.**

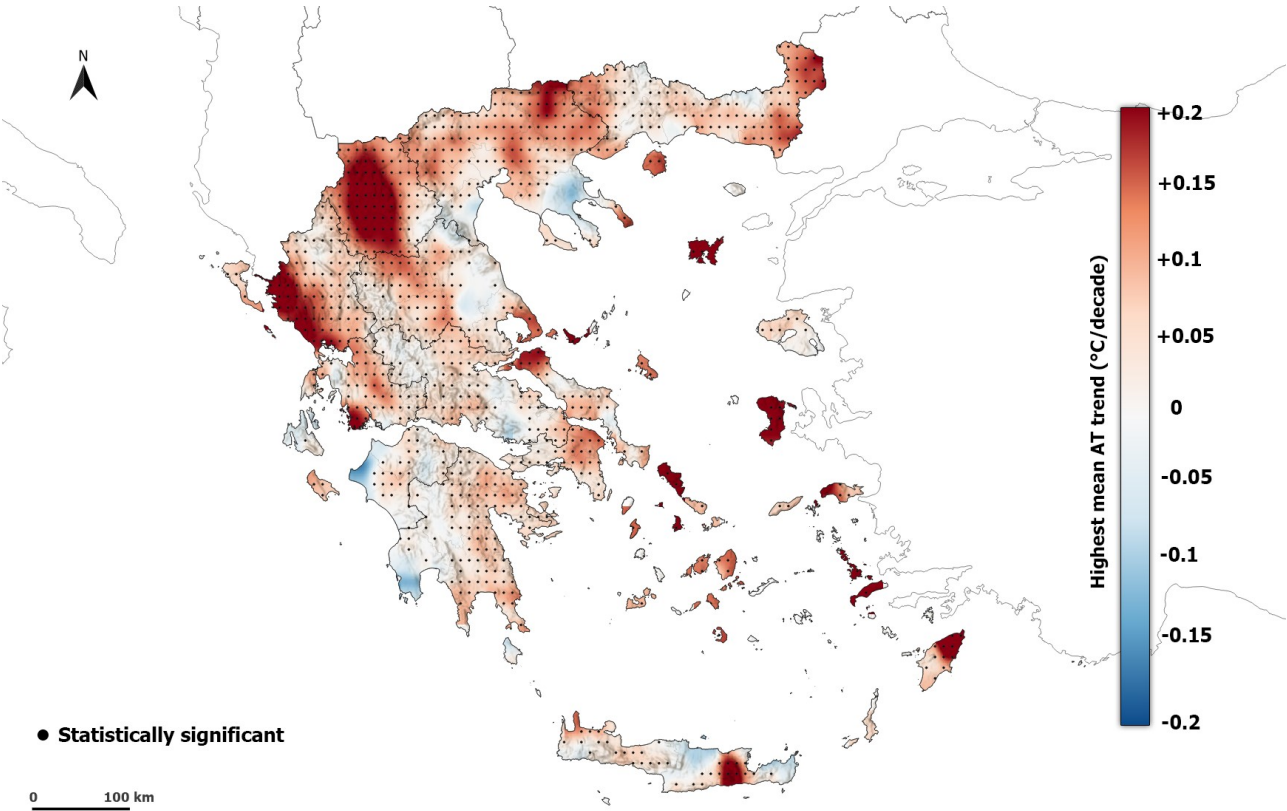

**Figure S4. Spatial distribution of summer HWA trend (°C per decade) calculated from ERA5-Land during the period 1950–2020. Dots indicate significant trends at the 95% level.**

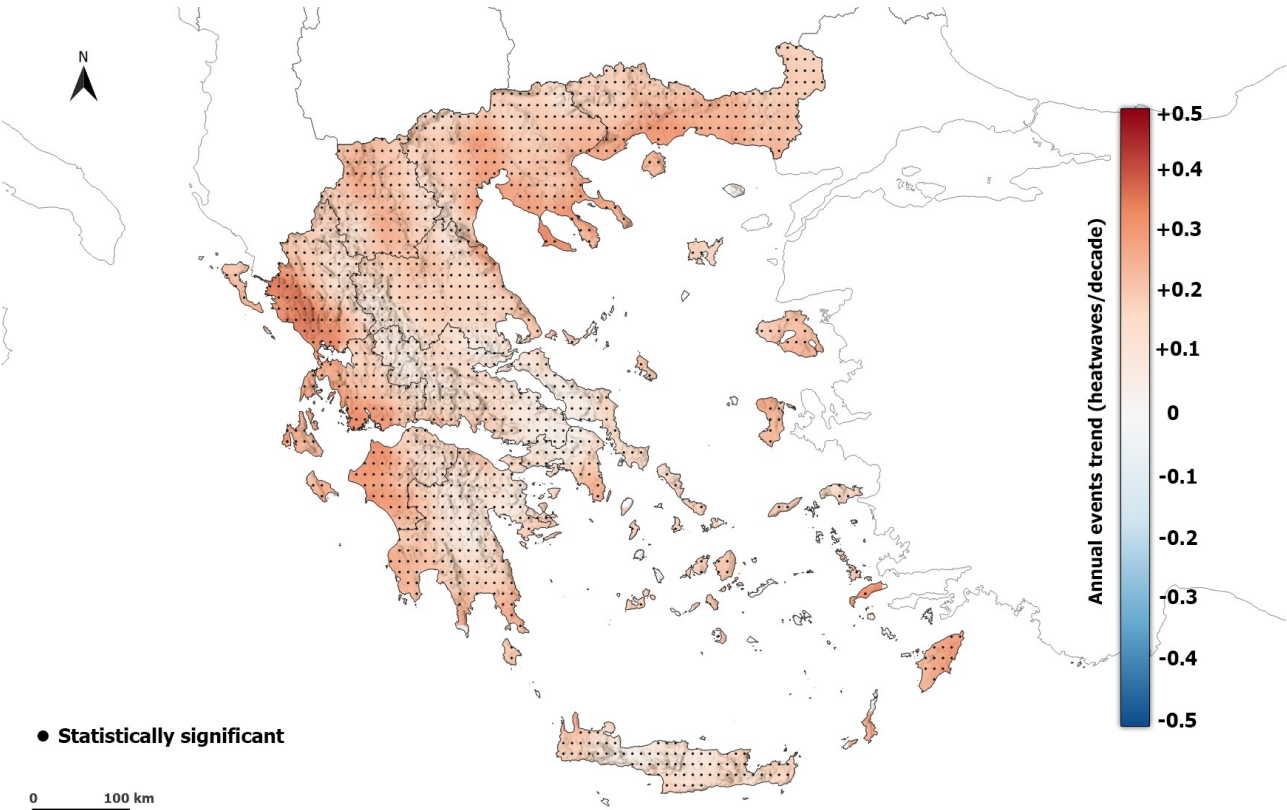

**Figure S5.** Spatial distribution of summer HWN trend (heatwaves per decade) calculated from ERA5-Land during the period 1950–2020. Dots indicate significant trends at the 95% level.

40

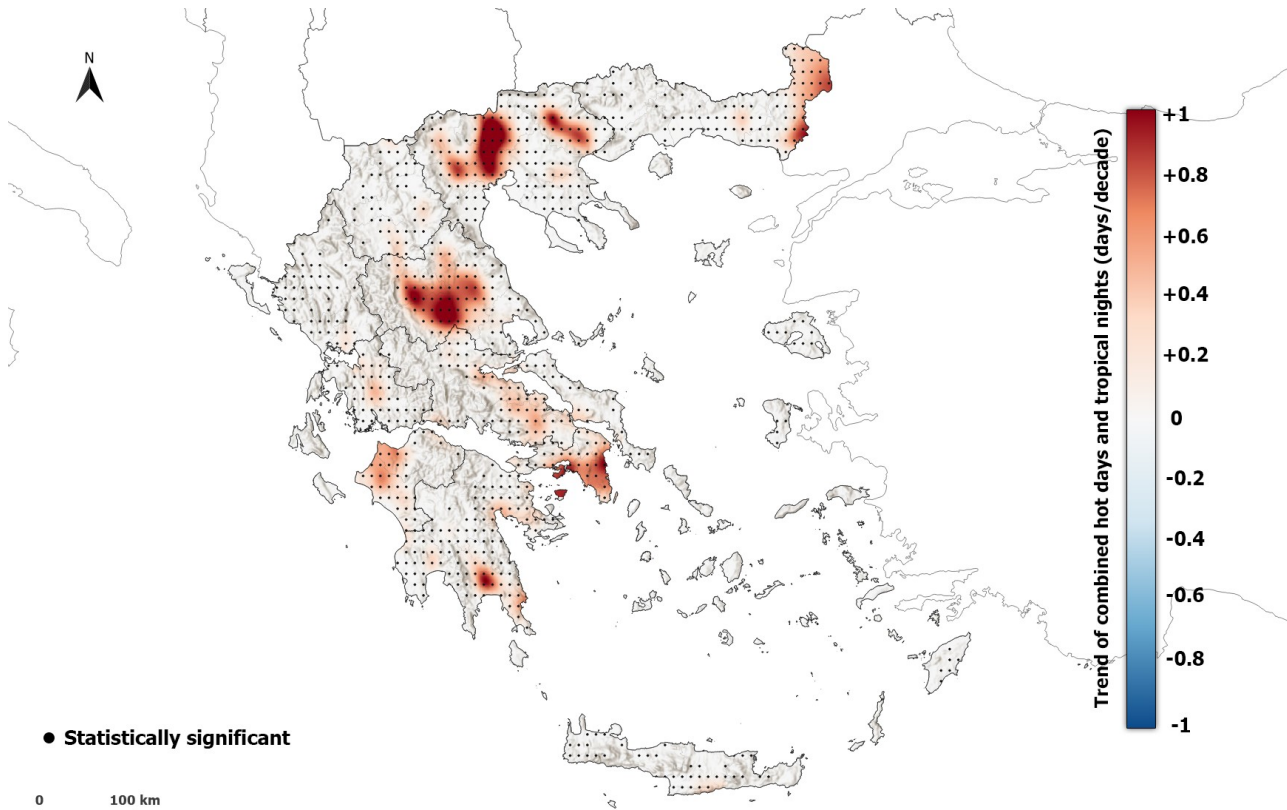

**Figure S6. Spatial distribution of summer CHT trend (days per decade) calculated from ERA5-Land during the period 1950–2020. Dots indicate significant trends at the 95% level.**

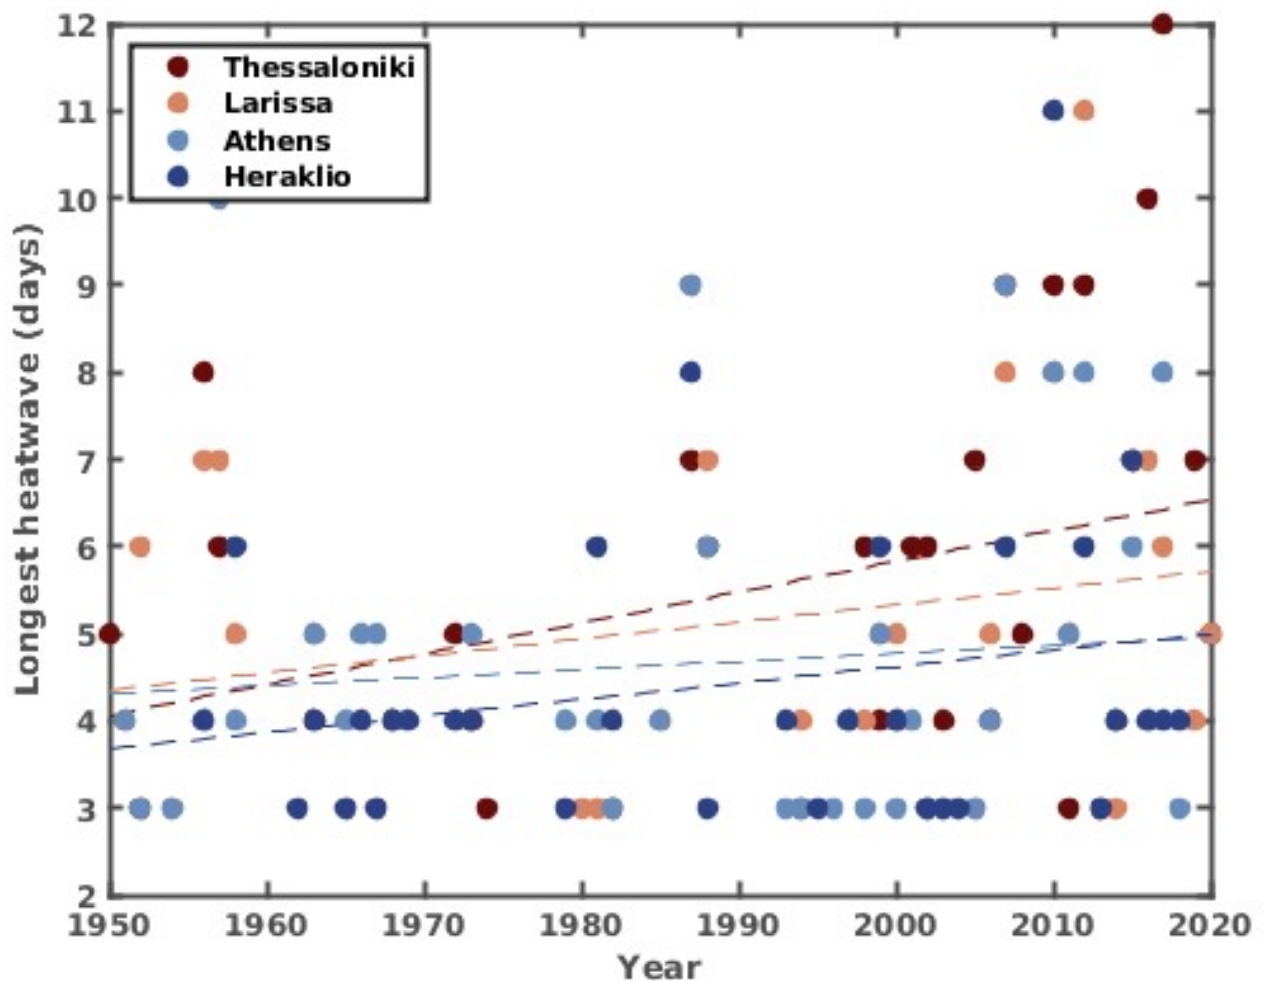

**Figure S7. Temporal evolution of HWD (days) for selected cities calculated from ERA5-Land during the period 1950–2020 (circle marker), plotted together trend line (dashed line).**



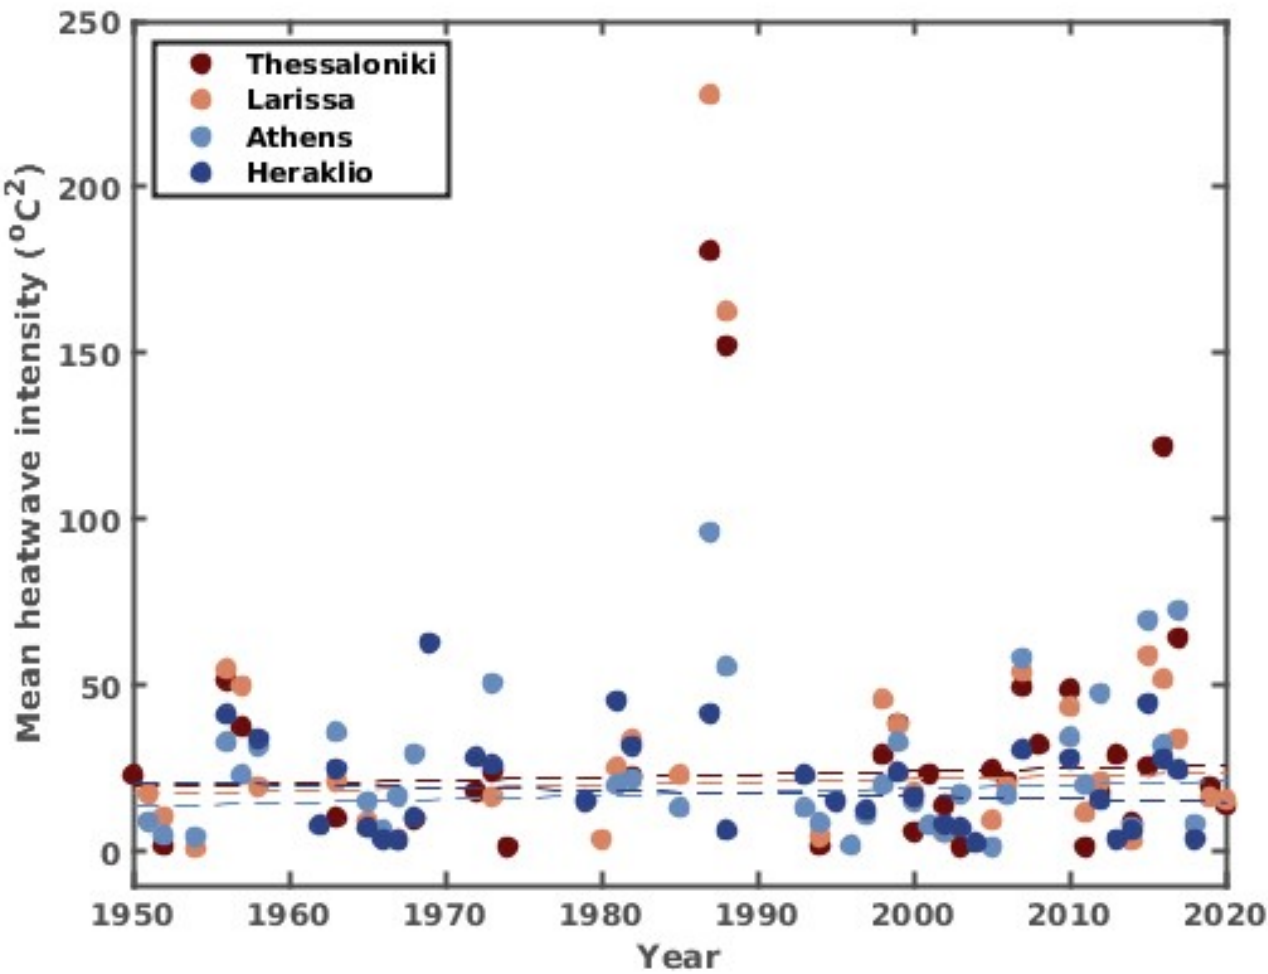

55 **Figure S8.** Temporal evolution of HWI (°C²) for selected cities calculated from ERA5-Land during the period 1950–2020 (circle marker), plotted together trend line (dashed line).

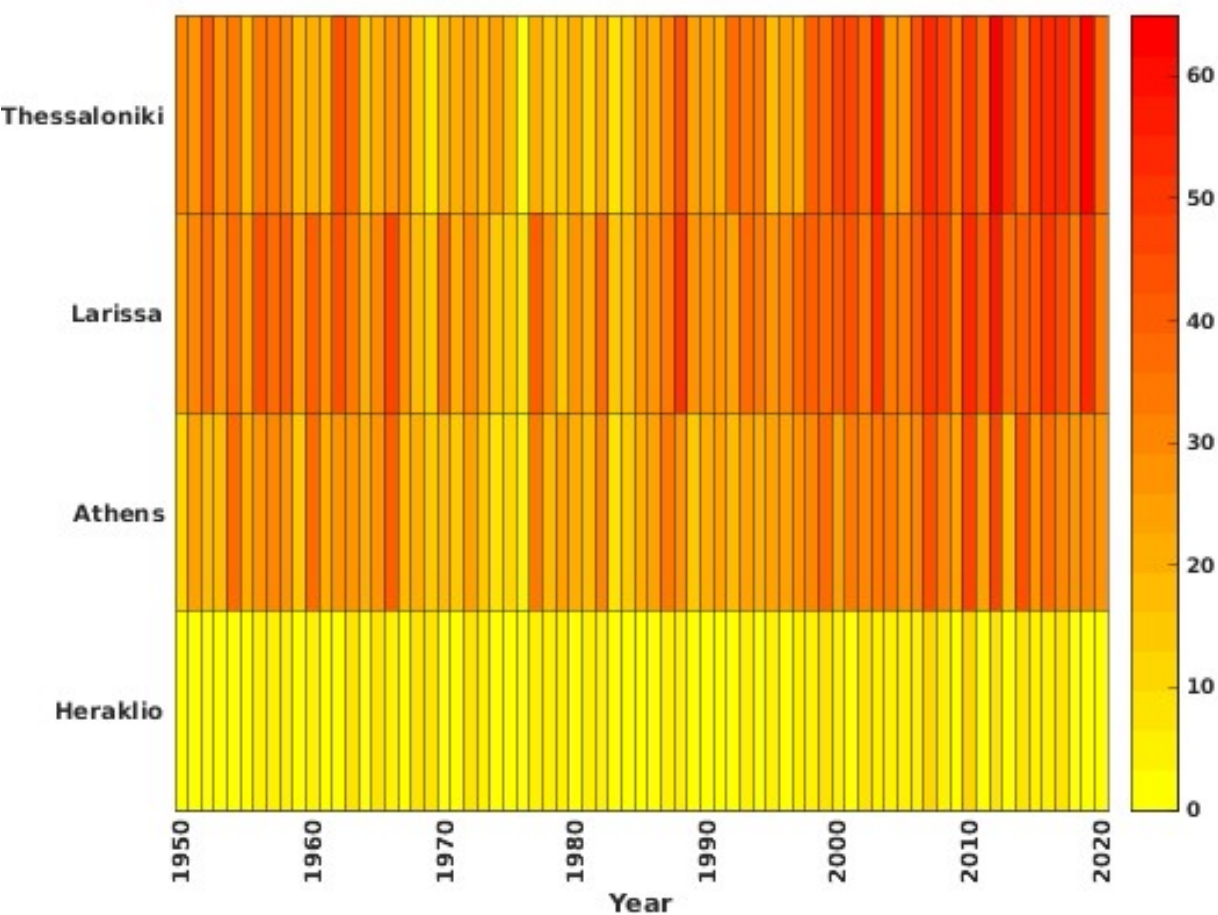

**Figure S9.** Heatmap of the temporal evolution of AT41C (days) for selected cities calculated from ERA5-Land during the period 1950–2020.
